# Supplementary material for: Mass Spectrometry Analysis and Biological Characterization of the Predatory Ant Odontomachus monticola Venom and Venom Sac Components
Source: MDPI journal article supplement (doi:10.3390/toxins11010050), 2019-01-17
Supplement: s1 [file s1]

# Supplementary Materials: Mass Spectrometry Analysis and Biological Characterization of the Predatory Ant *Odontomachus monticola* Venom and Venom Sac Components

Naoki Tani, Kohei Kazuma, Yukio Ohtsuka, Yasushi Shigeri, Keiichi Masuko, Katsuhiko Konno and Hidetoshi Inagaki

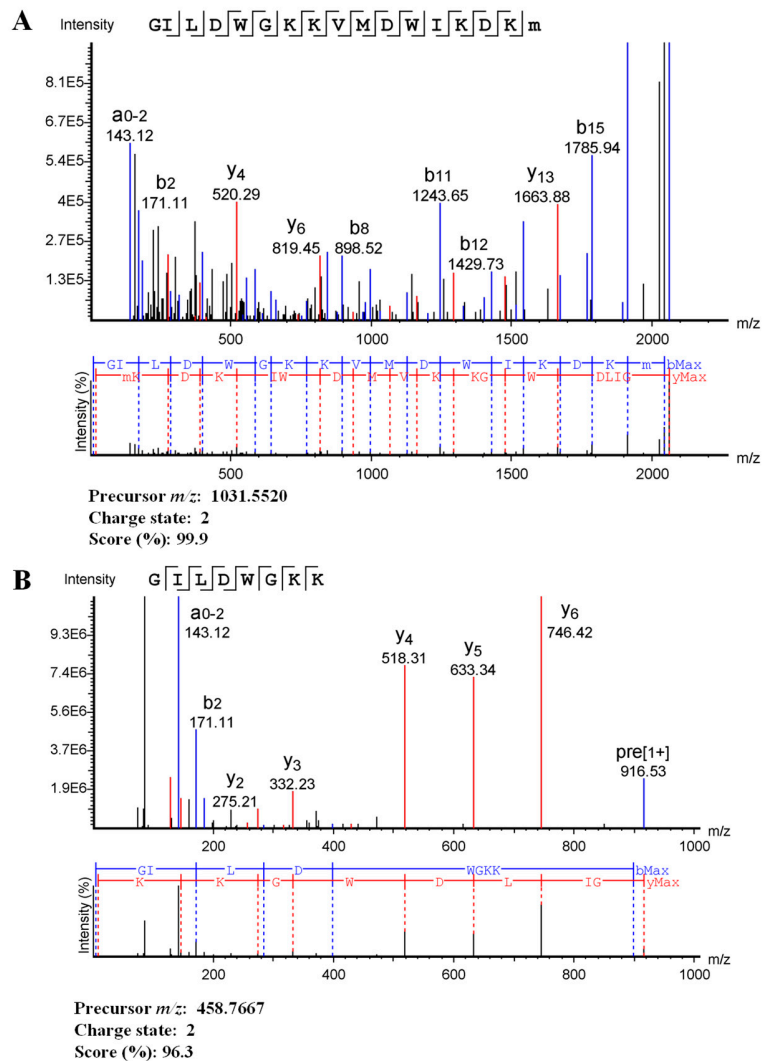

**Figure S1.** MS/MS spectra of pilosulin-like peptide 1. MS/MS spectra were obtained under a nonreducing condition without trypsin digestion (A) and under a reducing condition with trypsin digestion (B). The panel shows the annotated spectra and b- and y-ions of the pilosulin-like peptide 1 amino acid sequence. The peptide's precursor  $m/z$  and charge state are indicated. We referred to the transcriptome data of pilosulin-like peptide 1 for MS/MS spectrum interpretation.

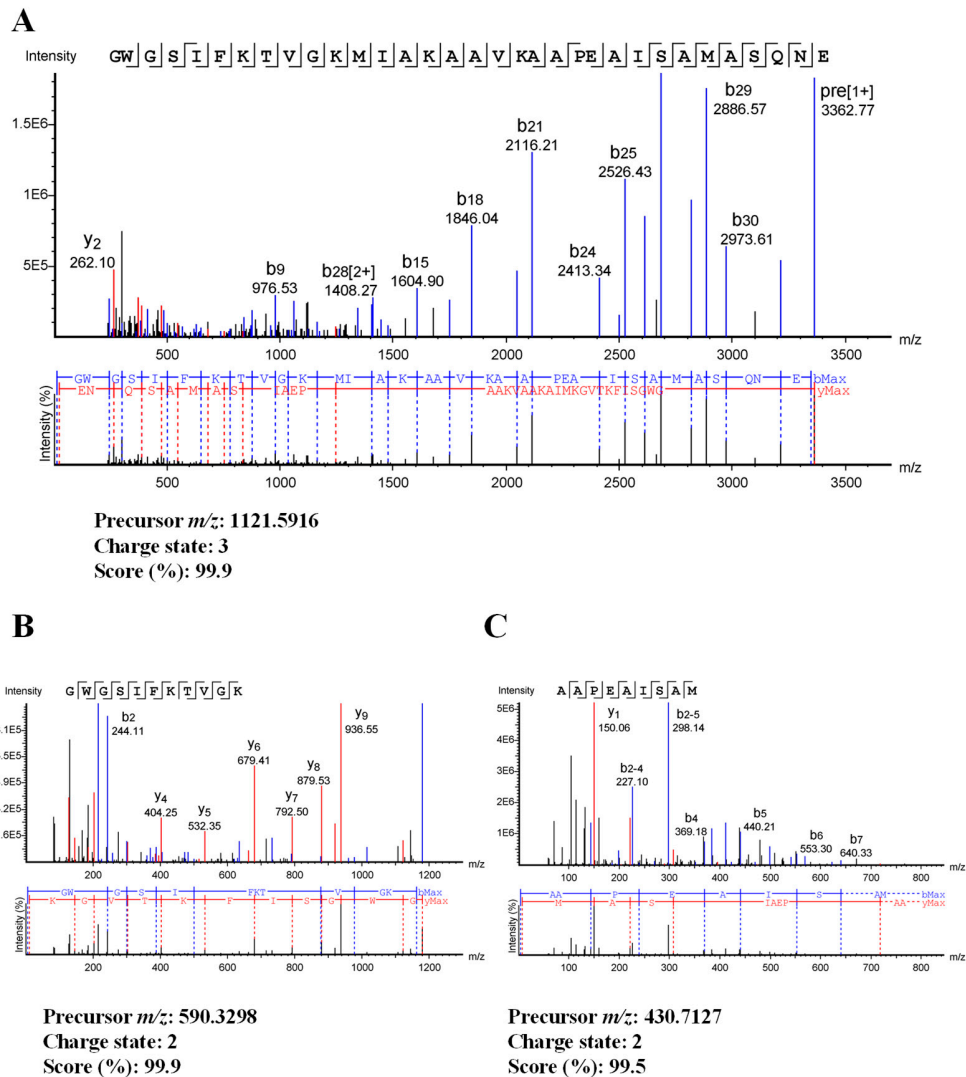

**Figure S2.** MS/MS spectra of pilosulin-like peptide 2. MS/MS spectra were obtained under a nonreducing condition without trypsin digestion (**A**), under a reducing condition without trypsin digestion (**B**), and under a reducing condition with trypsin digestion (**C**). The panel shows the annotated spectra and b- and y-ions of the pilosulin-like peptide 2 amino acid sequence. The peptide's precursor  $m/z$  and charge state are indicated. We referred to the transcriptome data of pilosulin-like peptide 2 for MS/MS spectrum interpretation.

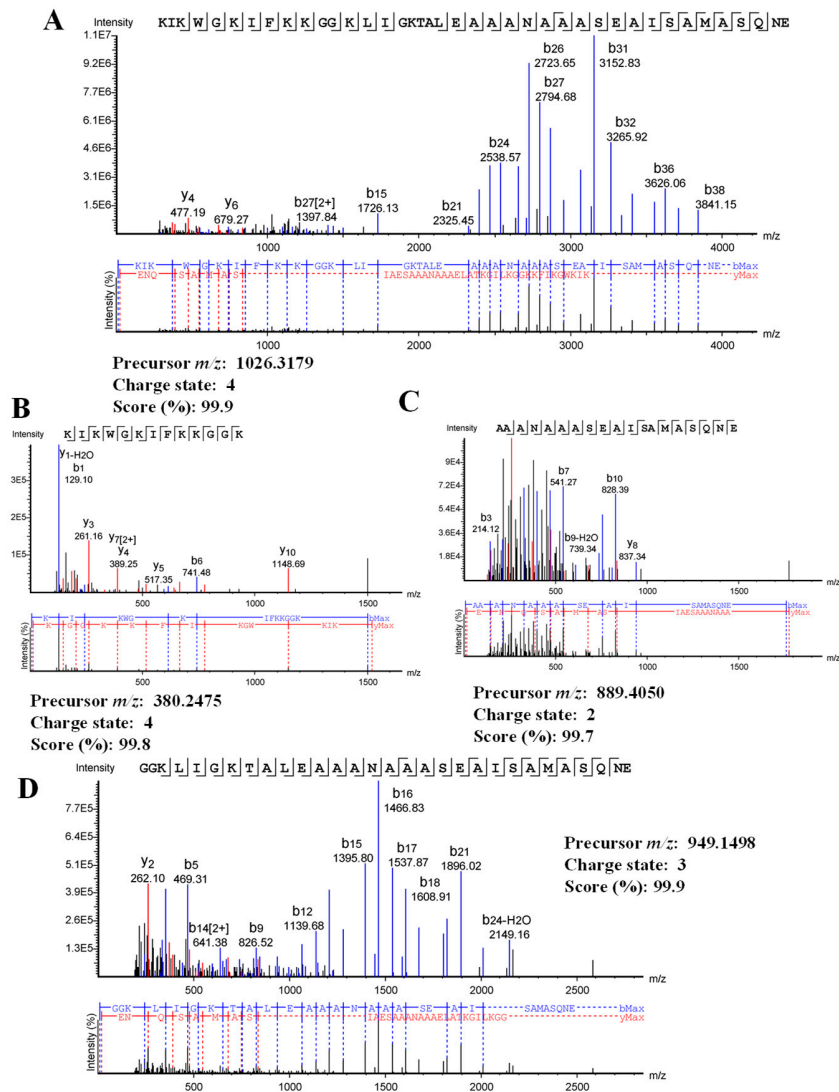

**Figure S3.** MS/MS spectra of pilosulin-like peptide 3. MS/MS spectra were obtained under a nonreducing condition without trypsin digestion (A,D) and under a reducing condition without trypsin digestion (B,C). The panel shows the annotated spectra and b- and y-ions of the pilosulin-like peptide 3 amino acid sequence. The peptide's precursor  $m/z$  and charge state are indicated. We referred to the transcriptome data of pilosulin-like peptide 3 for MS/MS spectrum interpretation.

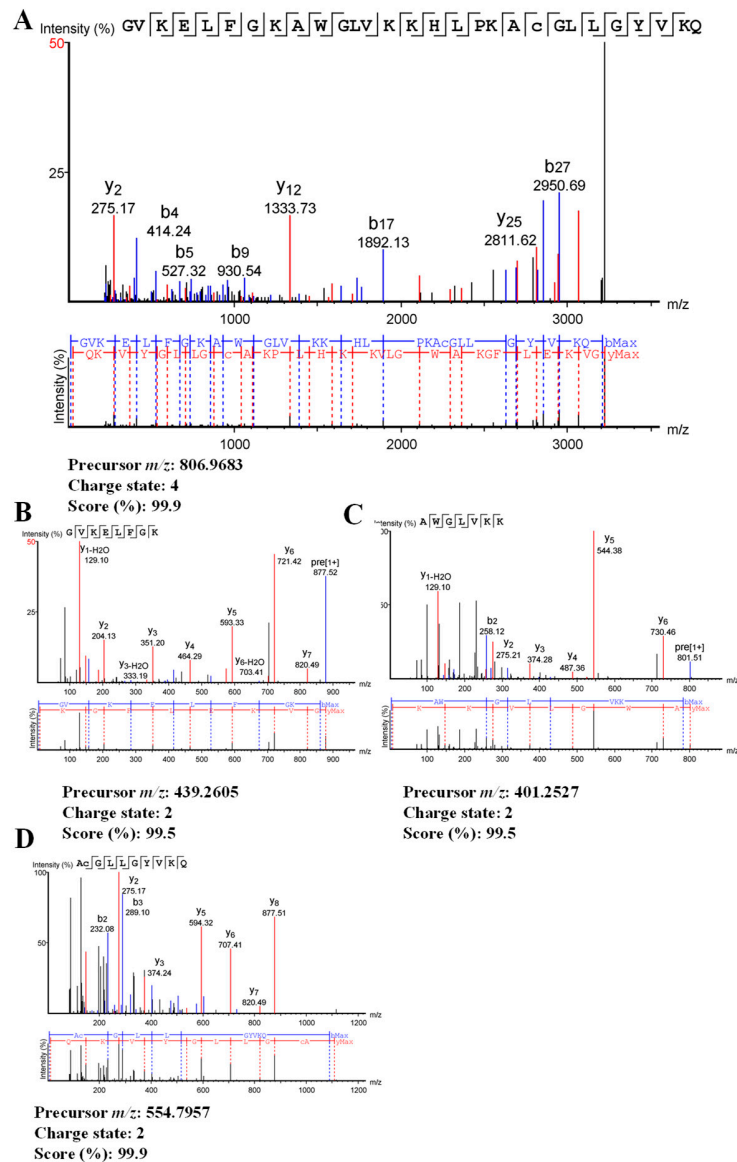

**Figure S4.** MS/MS spectra of pilosulin-like peptide 4. MS/MS spectra were obtained under a reducing condition without trypsin digestion (**A**) and under a reducing condition with trypsin digestion (**B–D**). The panel shows the annotated spectra and b- and y-ions of the pilosulin-like peptide 4 amino acid sequence. The peptide's precursor  $m/z$  and charge state are indicated. We referred to the transcriptome data of pilosulin-like peptide 4 for MS/MS spectrum interpretation.

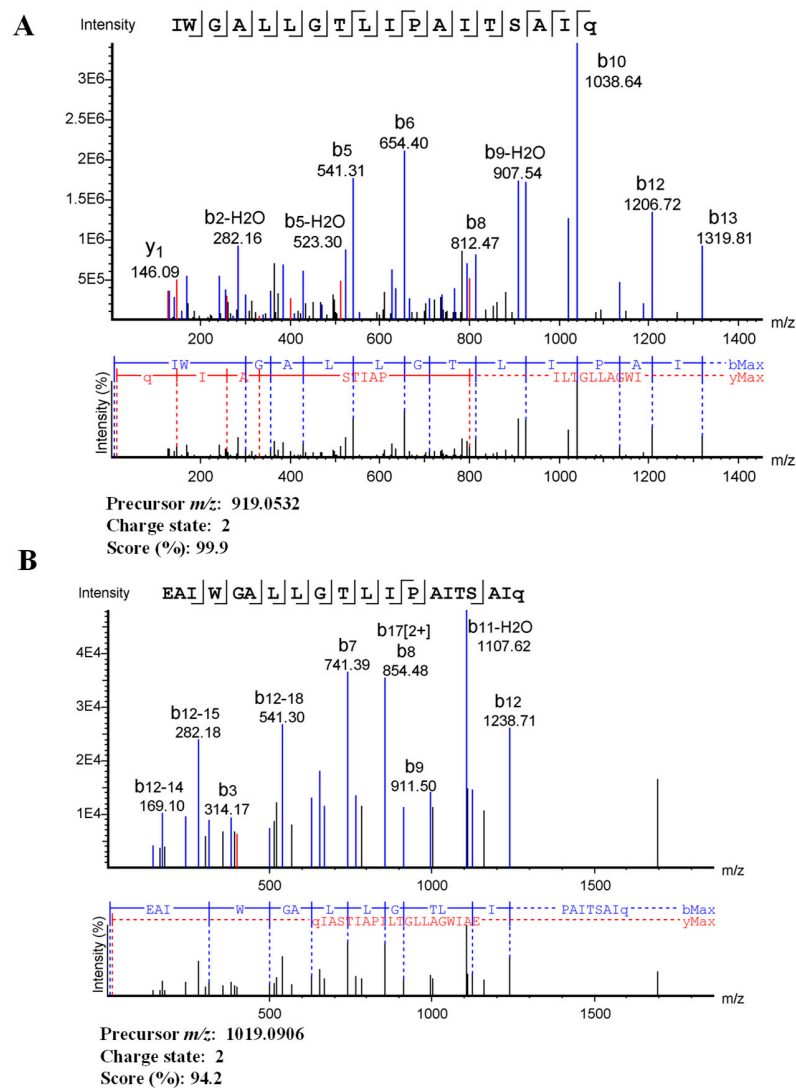

**Figure S5.** MS/MS spectra of pilosulin-like peptide 5. MS/MS spectra were obtained under a reducing condition without trypsin digestion (**A,B**). The panel shows the annotated spectra and b- and y-ions of the pilosulin-like peptide 5 amino acid sequence. The peptide's precursor  $m/z$  and charge state are indicated. We referred to the transcriptome data of pilosulin-like peptide 5 for MS/MS spectrum interpretation.

**A**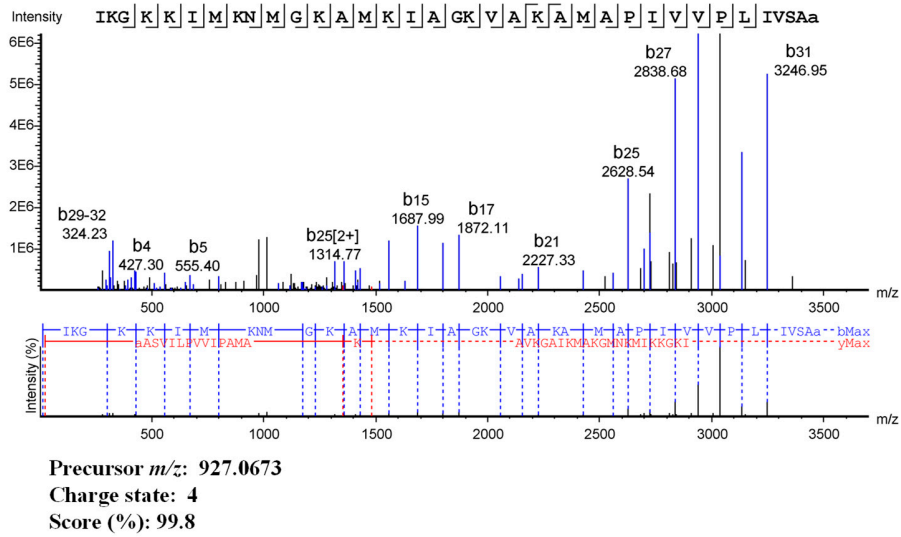**B**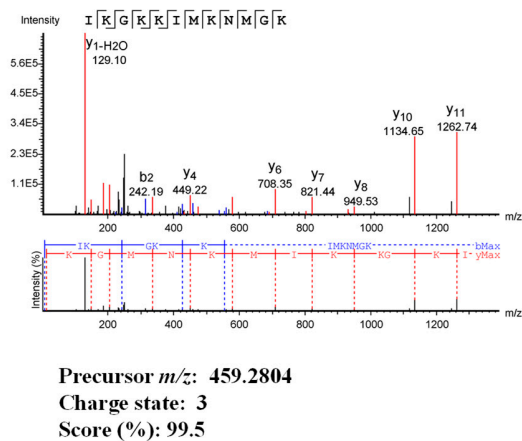**C**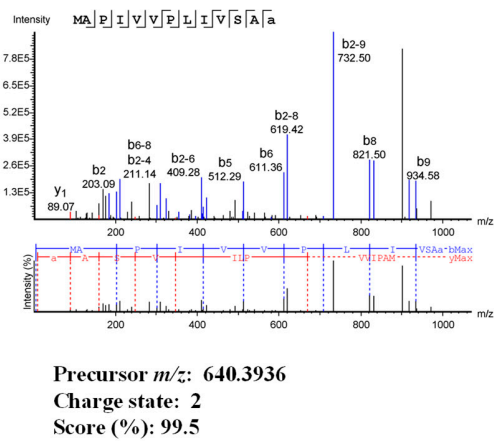

**Figure S6.** MS/MS spectra of pilosulin-like peptide 6. MS/MS spectra were obtained under a nonreducing condition without trypsin digestion (**A,C**) and under a reducing condition without trypsin digestion (**B**). The panel shows the annotated spectra and b- and y-ions of the pilosulin-like peptide 6 amino acid sequence. The peptide's precursor  $m/z$  and charge state are indicated. We referred to the transcriptome data of pilosulin-like peptide 6 for MS/MS spectrum interpretation.

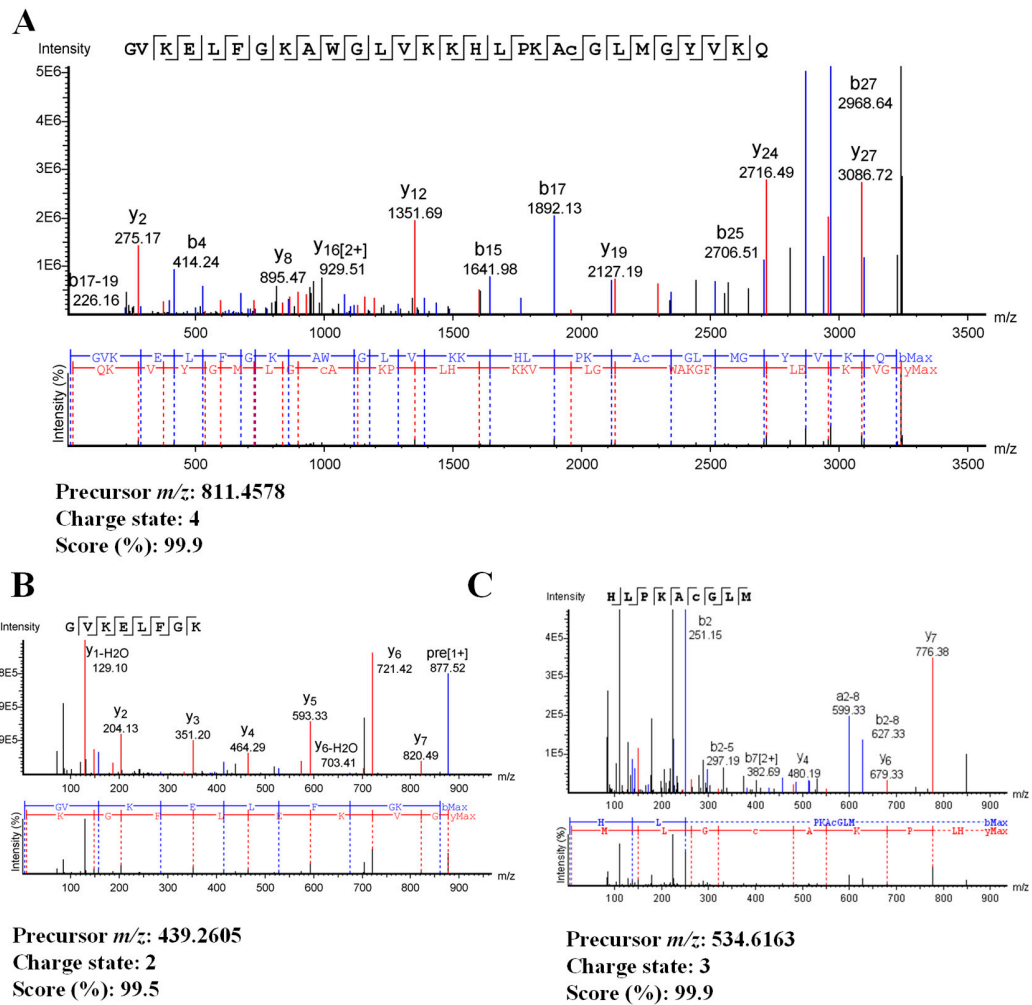

**Figure S7.** MS/MS spectra of pilosulin-like peptide 7. MS/MS spectra were obtained under a reducing condition without trypsin digestion (A,C) and under a reducing condition with trypsin digestion (B). The panel shows the annotated spectra and b- and y-ions of the pilosulin-like peptide 7 amino acid sequence. The peptide's precursor  $m/z$  and charge state are indicated. We referred to the transcriptome data of pilosulin-like peptide 7 for MS/MS spectrum interpretation.

**A**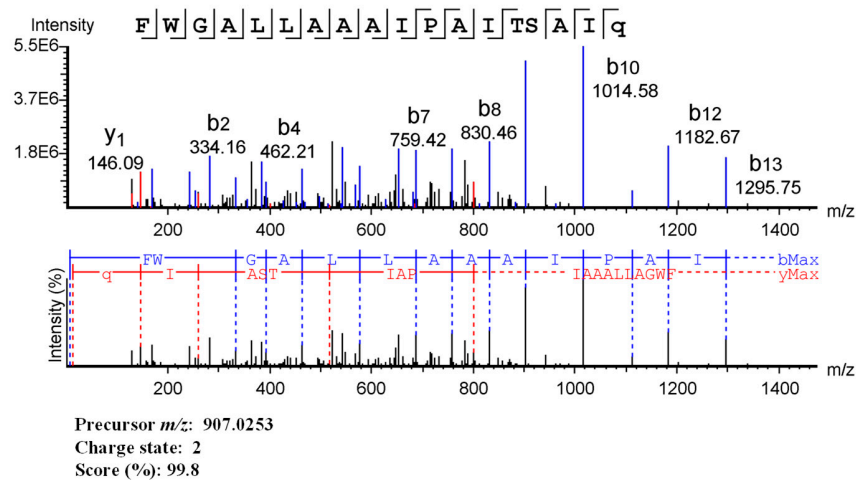**B**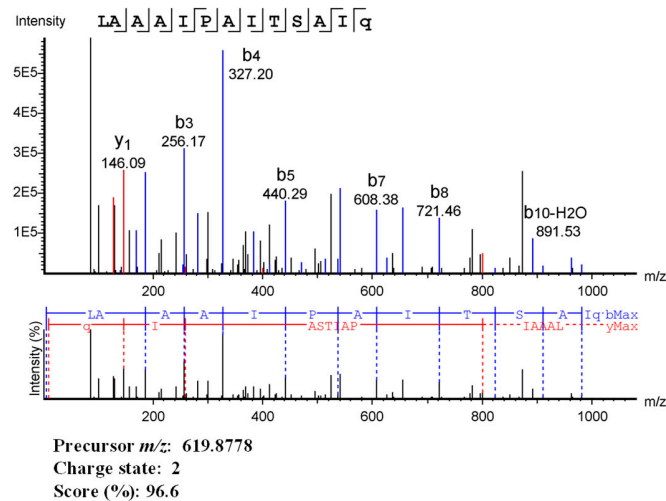

**Figure S8.** MS/MS spectra of pilosulin-like peptide 8. MS/MS spectra were obtained under a nonreducing condition without trypsin digestion (**A**) and under a reducing condition without trypsin digestion (**B**). The panel shows the annotated spectra and b- and y-ions of the pilosulin-like peptide 8 amino acid sequence. The peptide's precursor  $m/z$  and charge state are indicated. We referred to the transcriptome data of pilosulin-like peptide 8 for MS/MS spectrum interpretation.



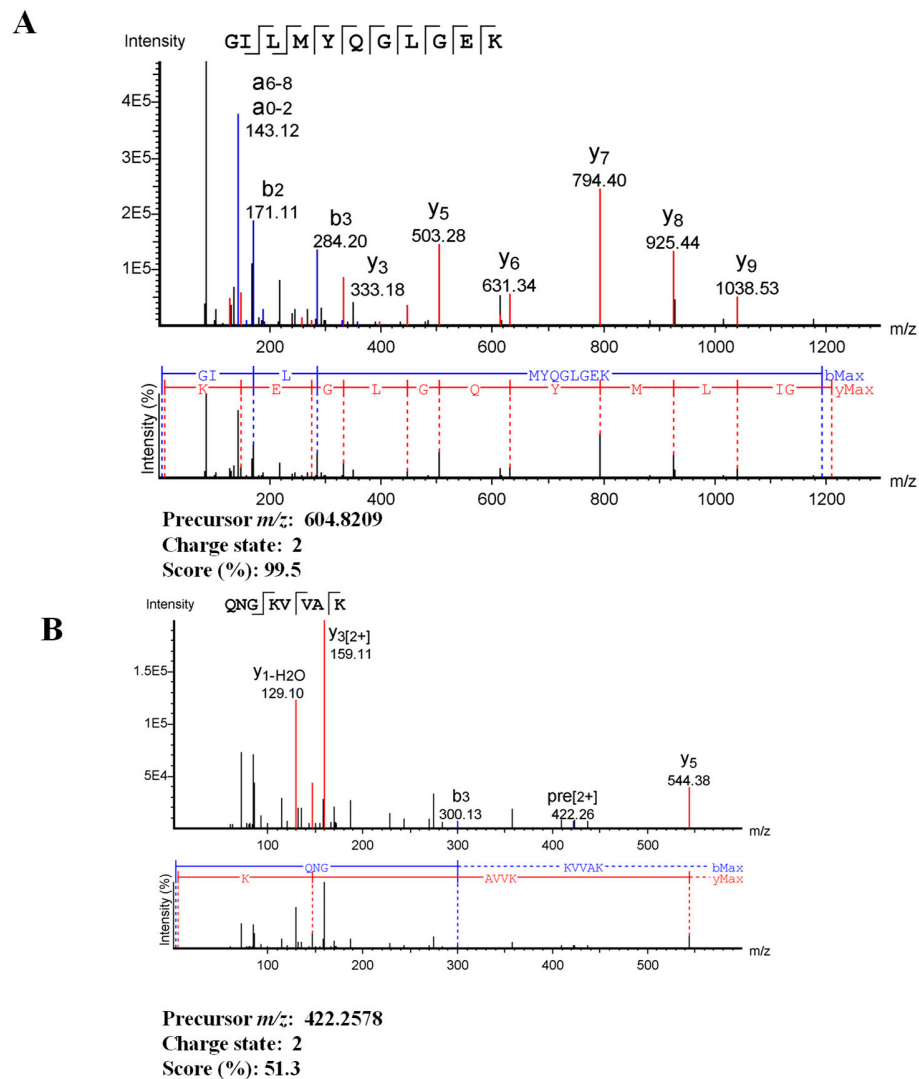

**Figure S9.** MS/MS spectra of pilosulin-like peptide 9. MS/MS spectra were obtained under a reducing condition with trypsin digestion (A,B). The panel shows the annotated spectra and b- and y-ions of the pilosulin-like peptide 9 amino acid sequence. The peptide's precursor  $m/z$  and charge state are indicated. We referred to the transcriptome data of pilosulin-like peptide 9 for MS/MS spectrum interpretation.

|     |     |     |     |     |     |     |     |     |     |     |     |     |     |     |     |
|-----|-----|-----|-----|-----|-----|-----|-----|-----|-----|-----|-----|-----|-----|-----|-----|
| Met | Lys | Pro | Ser | Gly | Leu | Thr | Leu | Ala | Phe | Leu | Val | Val | Phe | Met | 15  |
| ATG | AAA | CCG | TCG | GGT | CTC | ACG | TTG | GCT | TTC | TTG | GTA | GTT | TTT | ATG | 45  |
| Met | Ala | Ile | Met | Tyr | Asn | Ser | Val | Gln | Ala | Glu | Ala | Leu | Ala | Asp | 30  |
| ATG | GCG | ATC | ATG | TAC | AAT | TCG | GTA | CAA | GCG | GAA | GCA | TTA | GCT | GAT | 90  |
| Ala | Asp | Ala | Glu | Ala | Phe | Ala | Glu | Ala | Gly | Val | Lys | Glu | Leu | Phe | 45  |
| GCC | GAT | GCC | GAA | GCC | TTT | GCC | GAG | GCT | GGG | GTC | AAG | GAA | TTG | TTT | 135 |
| Gly | Lys | Ala | Trp | Gly | Leu | Val | Lys | Lys | His | Leu | Pro | Lys | Ala | Cys | 60  |
| GGT | AAA | GCG | TGG | GGA | CTT | GTC | AAA | AAG | CAC | TTA | CCC | AAA | GCG | TGT | 180 |
| Gly | Leu | Met | Gly | Tyr | Val | Lys | Gln |     |     |     |     |     |     |     | 75  |
| GGA | CTG | ATG | GGA | TAC | GTA | AAG | CAA | TAA | TAA | AGA | AGA | TAG | ATG | AAA | 225 |
| CAA | CCG | CAC | CGA | CGA | TAC | ACG | GAA | GGA | CAT | GAA | TAA | TGC | TTT | ACT | 270 |
| ATC | AAA | AAT | TTT | CTG | TTT | ACA | AGA | ATG | TCG | TTT | AAA | TTG | ATA |     | 315 |
| TTC | TAT | TAA | AGA | ATA | AAA | TTA | TCT | GCA | AAC | ACT | TAA | AAA | AAA | AAA | 360 |
| AAA | AA  |     | 398 |

**Figure S10.** Nucleotide and deduced amino acid sequences of pilosulin-like peptide 7. The putative mature peptide is highlighted in gray. Nucleotide sequence corresponding to the raw reads of transcriptome analysis is underlined. Arrowhead indicates the predicted N-termini of mature pilosulin-like peptide 7. The nucleotide sequence of pilosulin-like peptide 7 has been assigned DDBJ/EMBL/GenBank Accession No. LC416796.

|     |     |     |     |     |     |     |     |     |     |     |     |     |     |     |     |
|-----|-----|-----|-----|-----|-----|-----|-----|-----|-----|-----|-----|-----|-----|-----|-----|
| TAT | GTG | TGA | AAG | CTC | TTC | TAT | AAT | AAA | ATA | TAA | TTG | TAA | TAA | AAC | 45  |
| CTG | CAA | GTA | TCT | CTT | GTA | CAA | GGA | ATC | AAG | AAA | ACG | TAT | ATA | AAC | 90  |
| GGC | GCA | AAT | GCA | AGG | AAT | AAA | CAT | CAG | TTG | TGC | AAT | AAT | CAC | AAC | 135 |
|     |     |     |     |     |     |     |     |     | Met | Lys | Leu | Ser | Ala | Leu | 7   |
| TTC | AGC | TTT | GCT | CAA | TAC | GAA | ATG | ATG | AAA | TTG | TCG | GCT | TTG | TCG | 180 |
| Leu | Ala | Phe | Ala | Ile | Ile | Leu | Met | Met | Thr | Ile | Met | Tyr | Thr | Lys | 22  |
| TTG | GCT | TTT | GCC | ATA | ATC | CTT | ATG | ATG | ACG | ATC | ATG | TAT | ACT | AAA | 225 |
| Ala | Asp | Ala | Asp | Ala | Ser | Ala | Asp | Ala | Glu | Ala | Asp | Ala | Asp | Ala | 37  |
| GCG | GAT | GCG | GAC | GCA | AGT | GCC | GAT | GCT | GAG | GCC | GAT | GCG | GAT | GCT | 270 |
| Glu | Ala | Glu | Ala | Phe | Trp | Gly | Ala | Leu | Leu | Ala | Ala | Ala | Ile | Pro | 52  |
| GAA | GCA | GAA | GCA | TTC | TGG | GGT | GCT | CTG | TTA | GCA | GCA | GCA | ATA | CCA | 315 |
| Ala | Ile | Thr | Ser | Ala | Ile | Gln | Gly | Lys |     |     |     |     |     |     | 61  |
| GCA | ATA | ACT | TCC | GCA | ATA | CAA | GGG | AAA | TAA | ACG | AAA | GTA | TTG | AAA | 360 |
| GCA | ATC | GAC | GAC | ACA | TCA | AAA | TAG | AAA | ACG | AAG | AAG | CGA | TGA | CTC | 405 |
| TGG | AAC | GAA | AGG | AAA | TGA | ATA | ATA | CTA | TAA | AAA | ATG | AAT | ACT | ATC | 450 |
| AAA | AAT | TTA | TTC | TAG | CTT | GCG | TTT | ATC | GCA | GAC | AAT | TGA | TGT | ATT | 495 |
| AAT | GTC | GTT | CGA | TTG | GCA | TTA | CAT | TGG |     |     |     |     |     |     | 522 |

**Figure S11.** Nucleotide and deduced amino acid sequences of pilosulin-like peptide 8. The putative mature peptide is highlighted in gray. Arrowhead indicates the predicted N-termini of mature pilosulin-like peptide 8. The nucleotide sequence of pilosulin-like peptide 8 has been assigned DDBJ/EMBL/GenBank Accession No. LC416797.

|     |     |     |     |     |     |     |     |     |     |     |     |     |     |     |     |
|-----|-----|-----|-----|-----|-----|-----|-----|-----|-----|-----|-----|-----|-----|-----|-----|
| Met | Lys | Pro | Ser | Gly | Leu | Thr | Phe | Ala | Phe | Leu | Val | Val | Phe | Met | 15  |
| ATG | AAA | CCG | TCG | GGT | CTC | ACA | TTC | GCT | TTC | TTA | GTA | GTT | TTT | ATG | 45  |
| Met | Ala | Ile | Met | Tyr | Asn | Ser | Val | Gln | Val | Thr | Ala | Asp | Ala | Asp | 30  |
| ATG | GCG | ATC | ATG | TAC | AAT | TCG | GTA | CAA | GTG | ACA | GCT | GAT | GCC | GAT | 90  |
| Ala | Asp | Ala | Glu | Ala | Glu | Ala | Leu | Ala | Asn | Ala | Leu | Ala | Glu | Ala | 45  |
| GCC | GAT | GCT | GAA | GCC | GAA | GCC | CTT | GCC | AAT | GCC | CTT | GCC | GAG | GCT | 135 |
| ▼   |     |     |     |     |     |     |     |     |     |     |     |     |     |     |     |
| Gly | Ile | Leu | Met | Tyr | Gln | Gly | Leu | Gly | Glu | Lys | Ser | Asp | Gly | Leu | 60  |
| GGG | ATC | TTG | ATG | TAC | CAA | GGA | CTG | GGG | GAA | AAA | AGT | GAT | GGA | TTG | 180 |
| Asp | Gln | Gly | Gln | Asn | Gly | Lys | Val | Val | Ala |     |     |     |     |     | 75  |
| GAT | CAA | GGA | CAA | AAT | GGG | AAA | GTA | GTA | GCA | AAG | AAA | TAA | TAA | AGA | 225 |
| AGG | TAG | ATG | AAA | CAA | TCG | TAC | CGA | CAA | TAC | ACG | GAA | GGA | CAT | GGA | 270 |
| TAA | TGC | TTT | ACT | ATC | AAA | AAT | TTC | TTT | CTA | TTT | ACG | GCA | ATG | TCG | 315 |
| TTT | AAA | TTG | ATA | TTC | TAT | TAA | AGA | ATA | AAA | TTT | TCT | GCA | AAC | ATA | 360 |
| AAA |     |     |     | 393 |

**Figure S12.** Nucleotide and deduced amino acid sequences of pilosulin-like peptide 9. The putative mature peptide is highlighted in gray. Nucleotide sequence corresponding to the raw reads of transcriptome analysis is underlined. Arrowhead indicates the predicted N-termini of mature pilosulin-like peptide 9. The nucleotide sequence of pilosulin-like peptide 9 has been assigned DDBJ/EMBL/GenBank Accession No. LC416798.
