# Supplementary material for: Mass Spectrometry Analysis and Biological Characterization of the Predatory Ant Odontomachus monticola Venom and Venom Sac Components
Source: Toxins (Basel). 2019 Jan 17;11(1):50. doi: 10.3390/toxins11010050 (PMC6356579; doi:10.3390/toxins11010050)
Supplement: Supplementary file 1 [file toxins-11-00050-s001.zip › toxins-411586-Table S1.xlsx]

## Sheet: Sheet1
Table S1. Major 192 components of O. monticola venom
Accession number	Peptide and protein
LC316119	pilosulin-like peptide 1
FX985495	pilosulin-like peptide 2
FX985496	pilosulin-like peptide 3
FX985497	pilosulin-like peptide 4
FX985498	pilosulin-like peptide 5
FX985499	pilosulin-like peptide 6
LC416796	pilosulin-like peptide 7
LC416797	pilosulin-like peptide 8
LC416798	pilosulin-like peptide 9
FX985500	conotoxin-like S1
FX985501	conotoxin-like S2
FX985502	conotoxin-like S3
FX985503	conotoxin-like L
FX985504	icarapin
FX985505	hyaluronidase
FX985506	phospholipase A2 isozyme 1
FX985507	phospholipase A2 isozyme 2
FX985508	phospholipase A2 isozyme 3
FX985509	phospholipase ABHD3
FX985510	calcium independent phospholipase A2 gamma
FX985511	venom allergen 1
FX985512	venom allergen 2
FX985513	venom allergen 3
FX985514	venom allergen 4
FX985515	waprin 1
FX985516	waprin 2
FX985517	venom acid phosphatase 1
FX985518	venom acid phosphatase 2
FX985519	venom acid phosphatase 3
FX985520	Kazal
FX985521	VEGF-like protein
FX985522	venom serine protease 1
FX985523	venom serine protease 2
FX985524	venom serine protease 3
FX985525	venom serine protease 4
FX985526	venom metalloproteinase 1
FX985527	matrix metalloproteinase 2
FX985528	matrix metalloproteinase14
FX985529	a disintegrin and metalloproteinase domain-containing protein 12
FX985530	a disintegrin and metalloproteinase with thrombospondin motifs 7
FX985531	a disintegrin and metalloproteinase domain-containing protein 10
FX985532	venom carboxylesterase 1
FX985533	venom carboxylesterase 2
FX985534	phospholipase D1
FX985535	secapin
FX985536	Kunitz type protease inhibitor
FX985537	venom serine carboxypeptidase
FX985538	carboxypeptidase Q
FX985539	lysosomal ProX carboxypeptidase
FX985540	carboxypeptidase D
FX985541	cytosolic carboxypeptidaselike protein 5
FX985542	venom dipeptidyl peptidase 1
FX985543	venom dipeptidyl peptidase 2
FX985544	venom dipeptidyl peptidase 3
FX985545	venom dipeptidyl peptidase 4
FX985546	chitinase-like protein 1
FX985547	chitin binding protein
FX985548	protein disulfide isomerase 1
FX985549	protein disulfide isomerase 2
FX985550	protein disulfide isomerase 3
FX985551	peptidyl-alpha-hydroxy-glycine alpha amidatinglyase 1
FX985552	peptidyl-alpha-hydroxy-glycine alpha amidatinglyase 2
FX985553	elongation factor 2
FX985554	elongation factor 1alpha
FX985555	elongation factor 1gamma
FX985556	elongation factor Tu, mitochondrial
FX985557	elongation factor 1beta
FX985558	elongation factor G, mitochondrial
FX985559	elongation factor 1delta
FX985560	elongation factor Ts, mitochondrial
FX985561	apolipophorin 1
FX985562	apolipophorin 2
FX985563	vitellogenin 1
FX985564	vitellogenin 2
FX985565	vitellogenin 3
FX985566	very high density protein 1
FX985567	very high density protein 2
FX985568	cytochrome P450 1
FX985569	cytochrome P450 2
FX985570	cytochrome P450 3
FX985571	cytochrome P450 4
FX985572	cytochrome P450
FX985573	cytochrome P450
FX985574	NADPH cytochrome P450 reductase
FX985575	myosin heavy chain, muscle
FX985576	myosin regulatory light chain
FX985577	myosin light chain alkali
FX985578	myosin heavy chain nonmuscle
FX985579	myosin 2 essential light chain
FX985580	myosin VIIa
FX985581	myosin XV
FX985582	myosin Va
FX985583	myosin Ie
FX985584	myosin XVIIIa
FX985585	myosin regulatory light chain
FX985586	myosinIB
FX985587	actin muscle
FX985588	transcription factor A, mitochondrial
FX985589	voltage-gated sodium channel Para
FX985590	voltage-gated sodium channel beta subunit
FX985591	transient receptor potential cation channel protein A
FX985592	transient receptor potential cation channel protein M
FX985593	transient receptor potential cation channel protein V
FX985594	pheromone binding protein 1
FX985595	pheromone binding protein 2
FX985596	pheromone binding protein 3
FX985597	pheromone binding protein 4
FX985598	pheromone binding protein 5
FX985599	pheromone binding protein 6
FX985600	pheromone binding protein 7
FX985601	voltage-gated potassium channel protein Shaker
FX985602	voltage-gated potassium channel protein Shab
FX985603	voltage-gated potassium channel protein Shaw
FX985604	voltage-gated potassium channel protein Shal
FX985605	voltage-gated potassium channel protein Eag
FX985606	cytochrome c oxidase subunit 4
FX985607	cytochrome c oxidase subunit 5
FX985608	acetylcholine esterase
FX985609	acetylcholine receptor alpha subunit
FX985610	histone H3
FX985611	histone H2A
FX985612	laminin subunit gamma 1
FX985613	laminin subunit beta 1
FX985614	laminin subunit alpha 1
FX985615	40S ribosomal protein S3a
FX985616	40S ribosomal protein SA
FX985617	60S ribosomal protein L7a
FX985618	60S ribosomal protein L4
FX985619	40S ribosomal protein S6
FX985620	40S ribosomal protein S3
FX985621	60S acidic ribosomal protein P0
FX985622	60S ribosomal protein L7
FX985623	60S ribosomal protein L23a
FX985624	60S ribosomal protein L31
FX985625	60S ribosomal protein L6
FX985626	60S ribosomal protein L18
FX985627	60S ribosomal protein L34
FX985628	40S ribosomal protein S8
FX985629	60S ribosomal protein L36
FX985630	40S ribosomal protein S14
FX985631	60S acidic ribosomal protein P2
FX985632	60S ribosomal protein L17
FX985633	60S ribosomal protein L3
FX985634	60S ribosomal protein L10
FX985635	60S ribosomal protein L9
FX985636	uncharacterized protein
FX985637	uncharacterized protein
FX986013	ITG-like peptide
FX986014	diuretic hormone
FX986015	neuropeptide-like 1
FX986016	orcokinin
FX986017	allatostatin C
FX986018	rhodopsin
FX986019	allatotropin
FX986020	short neuropeptide
FX986021	royal jelly protein
FX986022	CAPA peptide
FX986023	IDSLRF
FX986024	defensin1
FX986025	defensin2
FX986026	chymotrypsin inhibitor 1
FX986027	chymotrypsin inhibitor 2
FX986028	peptidyl-prolyl cis-trans isomerase 1
FX986029	peptidyl-prolyl cis-trans isomerase 2
FX986030	peptidyl-prolyl cis-trans isomerase 3
FX986031	peptidyl-prolyl cis-trans isomerase 4
FX986032	peptidyl-prolyl cis-trans isomerase 5
FX986033	peptidyl-prolyl cis-trans isomerase 6
FX986034	peptidyl-prolyl cis-trans isomerase 7
FX986035	peptidyl-prolyl cis-trans isomerase 8
FX986036	resistance to inhibitors of cholinesterase 3
FX986037	lysozyme
FX986038	hymenoptaecin1
FX986039	hymenoptaecin2
FX986040	crustatin
FX986041	abaecin
FX986042	uncharacterized protein
FX986043	uncharacterized protein
FX986044	myosuppressin
FX986045	programmed cell death protein 2
FX986046	division abnormally delayed protein
FX986047	ATPase WRNIP1
FX986048	UDP glucuronosyltransferase 2C1
FX986049	CDV3 homolog
FX986050	dishevelled homolog 3
FX986051	DNA directed primase/polymerase protein
FX986052	PBAN type neuropeptide
FX986053	mitogenactivated protein kinase kinase 7
FX986054	UPF0518 protein
FX986055	transmembrane protein 214A
FX986056	neuroblastoma suppressor of tumorigenicity 1
FX986057	FMRF peptide
