# Supplementary material for: Mass Spectrometry Analysis and Biological Characterization of the Predatory Ant Odontomachus monticola Venom and Venom Sac Components
Source: Toxins (Basel). 2019 Jan 17;11(1):50. doi: 10.3390/toxins11010050 (PMC6356579; doi:10.3390/toxins11010050)
Supplement: Supplementary file 1 [file toxins-11-00050-s001.zip › toxins-411586-Table S2.xlsx]

## Sheet: Table S1
Table S2. Protein assignment of the de novo amino acid sequences
Contig name	Expect value	Alignment a	Proteinb
Om12913_c0_g1_i1	9e-09	Query: 1 ALPRFKVGVPVTLAR 15 ALPRFKVGVPVTLAR Sbjct: 555 ALPRFKVGVPVTLAR 599	royal jelly protein 1 OS=Apis mellifera
Om11660_c0_g1_i1	0.037	Query: 2 PIEPTYVIAWI 12 P EP+YVI WI Sbjct: 2801 PREPSYVITWI 2769	tubulin specific chaperone cofactor E-like protein OS=Homo sapiens
Om13134_c7_g2_i3	3e-25	Query: 1 AYTAKKSKKPALIAKSNIILDVKPWDDETDM 31 AYTAKKSKKPALIAKSNIILDVKPWDDETDM Sbjct: 976 AYTAKKSKKPALIAKSNIILDVKPWDDETDM 884	probable elongation factor 1-delta OS=Drosophila melanogaster
Om13431_c3_g11_i3	0.033	Query: 6 LHIFSLTK 13 LHIFSL K Sbjct: 1334 LHIFSLEK 1311	cytochrome P450 6d3 OS=Musca domestica
Om19160_c0_g1_i1	0.014	Query: 3 LSYLGSFLIF 12 L+YL FLIF Sbjct: 65 LTYLSPFLIF 94	cortactin-binding protein 2 OS=Muntiacus muntjak
Om1574_c0_g1_i1	2e-26	Query: 1 EAPLFSINGSSYVAISPVKDGPAGYYKHIIW 31 EAPLFSINGSSYVAISPVKDGPAGYYKHIIW Sbjct: 1716 EAPLFSINGSSYVAISPVKDGPAGYYKHIIW 1624	venom dipeptidyl peptidase 4 OS=Vespula vulgaris
Om13234_c6_g1_i8	1e-25	Query: 1 EEMLSVFYTGHESVPPYEVVPVFHTIQKRS 30 EEMLSVFYTGHESVPPYEVVPVFHTIQKRS Sbjct: 929 EEMLSVFYTGHESVPPYEVVPVFHTIQKRS 1018	venom metalloproteinase 3 OS=Eulophus pennicornis
Om12471_c0_g1_i9	4e-23	Query: 1 ENIKYFNNKVICDLIEEKYKGIISLMDE 28 ENIKYFNNKVICDLIEEKYKGIISLMDE Sbjct: 1611 ENIKYFNNKVICDLIEEKYKGIISLMDE 1694	myosin IB OS=Drosophila melanogaster
Om10424_c0_g1_i1	9e-16	Query: 1 FDHSGVISYIVEKKDTESMKM 21 FDHSGVISYIVEKKDTESMKM Sbjct: 662 FDHSGVISYIVEKKDTESMKM 724	vitellogenin1 OS=Fundulus heteroclitus
Om9765_c0_g2_i1	4e-08	Query: 6 QSKIGSLDNITHVPGGGNKKI 26 +SK+GSLDN H PGGG+KKI Sbjct: 1036 ESKVGSLDNMKHKPGGGDKKI 1098	microtubule-associated protein 2 OS=Rattus norvegicus
Om11409_c0_g1_i2	0.058	Query: 1 FRPRRKCRRQS 11 FRPRR CRR S Sbjct: 1394 FRPRRSCRRLS 1426	prickle OS=Aedes aegypti
Om8745_c0_g2_i1	0.044	Query: 13 AMSIVKLRSDDRL 25 AMSIVK +SD+RL Sbjct: 2885 AMSIVKEKSDNRL 2923	F-box/WD repeat-containing protein 1A OS=Homo sapiens
Om9641_c2_g2_i1	1e-12	Query: 1 GENSSDGETGEGGTKHTGP 19 GENSSDGETGEGGTKHTGP Sbjct: 488 GENSSDGETGEGGTKHTGP 544	vitellogenin 1 OS=Fundulus heteroclitus
Om12433_c0_g1_i2	0.026	Query: 4 IGPCISNPC 12 IGPCIS PC Sbjct: 3014 IGPCISTPC 3040	FAM234B OS=Mus musculus
Om13392_c2_g1_i2	5e-17	Query: 1 GPASSPALRRPRQLGDMGTPTRP 23 GPASSPALRRPRQLGDMGTPTRP Sbjct: 1166 GPASSPALRRPRQLGDMGTPTRP 1098	dual specificity mitogen-activated protein kinase kinase 7 OS=Homo sapiens
Om15837_c1_g1_i1	1e-25	Query: 1 GPLIVYGKDEGICKAFRNIPGVDLMNINKM 30 GPLIVYGKDEGICKAFRNIPGVDLMNINKM Sbjct: 1159 GPLIVYGKDEGICKAFRNIPGVDLMNINKM 1070	60S ribosomal protein L4 OS=Drosophila melanogaster
Om6740_c1_g1_i1	3e-28	Query: 1 GYGDMTPKTFPGMFIGGLCALAGVLTIALPVPV 33 GYGDMTPKTFPGMFIGGLCALAGVLTIALPVPV Sbjct: 294 GYGDMTPKTFPGMFIGGLCALAGVLTIALPVPV 196	voltage-gated potassium channel Shaw OS=Drosophila melanogaster
Om13219_c2_g4_i5	0.021	Query: 1 HWMREELDLCYI 12 HWM + LD CYI Sbjct: 9226 HWMNDILDICYI 9191	zinc finger FYVE domain-containing protein 26 homolog OS=Drosophila melanogaster
Om17608_c0_g1_i1	2e-13	Query: 1 ICLSYAAKCVLKMGLAAPE 19 ICLSYAAKCVLKMGLAAPE Sbjct: 187 ICLSYAAKCVLKMGLAAPE 131	Omega-conotoxin-like protein 1 OS=Apis mellifera
Om13291_c1_g1_i1	0.069	Query: 1 IGTRGSASVLKDKKGL 16 IGT SAS+ DKKGL Sbjct: 1304 IGTSSSASITSDKKGL 1351	putative BTB/POZ domain-containing protein L89 OS=Acanthamoeba polyphaga mimivirus
Om6595_c0_g1_i1	0.098	Query: 12 TPQRCNKGKFV 22 TPQRC++GK+V Sbjct: 910 TPQRCHRGKYV 942	serine/threonine protein phosphatase 4 regulatory subunit 1 OS=Homo sapiens
Om8814_c0_g1_i1	0.071	Query: 12 TPQRCNKGKFV 22 TPQRC++GK+V Sbjct: 910 TPQRCHRGKYV 942	krueppel-related zinc finger protein 1 OS=Homo sapiens
Om8036_c1_g1_i1	8e-19	Query: 1 KDGKIVKNNASTEYDLTEKTITPMG 25 KDGKIVKNNASTEYDLTEKTITPMG Sbjct: 974 KDGKIVKNNASTEYDLTEKTITPMG 1048	60S ribosomal protein L3 OS=Drosophila melanogaster
Om3385_c0_g1_i1	0.02	Query: 1 KFDEAGVKE 9 KFDEAGVKE Sbjct: 1020 KFDEAGVKE 994	neuroblastoma suppressor of tumorigenicity 1 OS=Xenopus tropicalis
Om10708_c0_g1_i2	0.007	Query: 1 KLKEQPDVM 9 KLKEQPDVM Sbjct: 1390 KLKEQPDVM 1416	peptidyl-prolyl cis-trans isomerase FKBP4 OS=Homo sapiens
Om11277_c1_g1_i1	5e-23	Query: 1 KLQAQIKDCTRETEEARAARDELAAASKEN 30 KLQAQIKDCTRETEEARAARDELAAASKEN Sbjct: 5096 KLQAQIKDCTRETEEARAARDELAAASKEN 5185	myosin heavy chain, non-muscle OS=Drosophila melanogaster
Om12972_c0_g2_i6	0.044	Query: 11 SERINVPKENVNDFEKD 27 S+RI V +EN+N FE + Sbjct: 3876 SDRISVNRENINIFENE 3926	groucho OS=Drosophila melanogaster
Om12075_c0_g2_i1	8e-31	Query: 1 KVYNNLAASQMKIQSYDVALESVENVLSFQPRNVKAL 37 KVYNNLAASQMKIQSYDVALESVENVLSFQPRNVKAL Sbjct: 645 KVYNNLAASQMKIQSYDVALESVENVLSFQPRNVKAL 535	peptidyl-prolyl cis-trans isomerase FKBP8 OS=Homo sapiens
Om2135_c0_g2_i1	0.0002	Query: 1 LKHTGPGILSMA 12 LKHTGPG LSMA Sbjct: 725 LKHTGPGTLSMA 760	peptidyl-prolyl cis-trans isomerase E OS=Pongo abelii
Om13060_c0_g2_i1	0.007	Query: 4 TIAALYIRVEYRL 16 T+ ALYIR +YRL Sbjct: 346 TVEALYIRLQYRL 308	small RNA 2'-O-methyl transferase OS=Drosophila melanogaster
Om12908_c0_g2_i7	0.071	Query: 14 RSKKQQTSQQSATV 27 R+ KQQTSQQ TV Sbjct: 4496 RTHKQQTSQQVTTV 4455	catenin delta-2 OS=Homo sapiens
Om7867_c0_g1_i1	3e-25	Query: 1 NFPDHYTINSFNQQQQPETKAVMNWIAKV 29 NFPDHYTINSFNQQQQPETKAVMNWIAKV Sbjct: 3627 NFPDHYTINSFNQQQQPETKAVMNWIAKV 3541	carboxypeptidase D OS=Drosophila melanogaster
Om10326_c1_g1_i1	4e-22	Query: 1 NGCPLRRVSQNYVIATSTKLDLSGFELP 28 NGCPLRRVSQNYVIATSTKLDLSGFELP Sbjct: 389 NGCPLRRVSQNYVIATSTKLDLSGFELP 306	60S ribosomal protein L6 OS=Sus scrofa
Om6575_c0_g2_i1	1e-23	Query: 1 NIRPMQLALFQGKARKTTAALTVEMEASEN 30 NIRPMQLALFQGKARKTTAALTVEMEASEN Sbjct: 1268 NIRPMQLALFQGKARKTTAALTVEMEASEN 1357	peptidyl-prolyl isomerase domain and WD repeat-containing protein 1 OS=Bos taurus
Om12393_c0_g1_i2	1e-12	Query: 1 NSPESLSKLIWRMYALYD 18 NSPESLSKLIWRMYALYD Sbjct: 782 NSPESLSKLIWRMYALYD 729	vitellogenin 6 OS=Oscheius tipulae
Om10761_c0_g1_i1	0.085	Query: 5 SFKVVKSIY 13 +FKV SIY Sbjct: 45 TFKVTMSIY 71	catenin delta-2 OS=Homo sapiens
Om12866_c0_g1_i1	3e-12	Query: 1 PALRGHLSVMARTHKLPE 18 PALRGHLSVMARTHKLPE Sbjct: 351 PALRGHLSVMARTHKLPE 404	neuropeptide-like 1 OS=Camponotus floridanus
Om21361_c0_g1_i1	3e-16	Query: 1 QYEAYEGIPYAYPPVGKLRFQ 21 QYEAYEGIPYAYPPVGKLRFQ Sbjct: 1662 QYEAYEGIPYAYPPVGKLRFQ 1600	venom carboxylesterase 6 OS=Apis mellifera
Om18656_c0_g1_i1	0.049	Query: 1 RITSLVLLRIQKAAGPPKY 19 RI SLVLLR +KA P Y Sbjct: 777 RIISLVLLRHEKATFPSAY 833	chaperone protein HscA homolog OS=Colwellia psychrerythraea (strain 34H / ATCC BAA681)
Om18800_c0_g1_i1	3e-12	Query: 1 RKDVVPKTAENFRALCTG 18 RKDVVPKTAENFRALCTG Sbjct: 1449 RKDVVPKTAENFRALCTG 1396	peptidyl-prolyl cis-trans isomerase OS=Blattella germanica
Om12268_c0_g1_i9	8e-25	Query: 1 RKTIFILAIVAGCFAVLWPKIFYPMLTAS 29 RKTIFILAIVAGCFAVLWPKIFYPMLTAS Sbjct: 180 RKTIFILAIVAGCFAVLWPKIFYPMLTAS 266	resistance to inhibitors of cholinesterase 3 OS=Caenorhabditis briggsae
Om4523_c0_g1_i1	0.055	Query: 4 RISDGKLEQ 12 RISD K+EQ Sbjct: 606 RISDVKMEQ 632	cubilin homolog OS=Drosophila melanogaster
Om18030_c0_g1_i1	3e-29	Query: 1 TDYLMKILTERGYSFTTTAEREIVRDIKEKLCYV 34 TDYLMKILTERGYSFTTTAEREIVRDIKEKLCYV Sbjct: 266 TDYLMKILTERGYSFTTTAEREIVRDIKEKLCYV 367	actin 5C OS=Anopheles gambiae
Om27483_c0_g1_i1	0.096	Query: 3 RGKTLYEIQV 12 RG +LYEIQV Sbjct: 997 RGSSLYEIQV 968	lymphocyte antigen 6 complex locus protein G6d OS=Mus musculus
Om13253_c2_g1_i4	5e-08	Query: 5 KIRTTETQVLVASAQKKLLEERLK 28 K R+TET+V VASAQK + EER+K Sbjct: 1600 KMRSTETEVFVASAQKNMHEERMK 1671	histidine tRNA ligase, cytoplasmic OS=Bos taurus
Om12948_c0_g1_i5	0.099	Query: 2 RTVESRQAQDLAR 14 RTVES DLAR Sbjct: 2083 RTVESWRSRDLAR 2121	diaphanous OS=Drosophila melanogaster
Om13167_c2_g2_i9	0.025	Query: 8 RPPVAMVAVKKSSRNKAI 25 RPPV M VK S KA+ Sbjct: 7824 RPPVPMLGVKTPSSSKAV 7877	helicase domino OS=Drosophila melanogaster
Om7764_c0_g1_i7	3e-27	Query: 1 ASNFLWPFKLNTPNGGWRKKTNHYVEGGDFG 31 ASNFLWPFKLNTPNGGWRKKTNHYVEGGDFG Sbjct: 576 ASNFLWPFKLNTPNGGWRKKTNHYVEGGDFG 484	rhoGEF and PH domain containing protein 4 OS=Homo sapiens
Om2064_c0_g1_i1	2e-14	Query: 1 ASSRGSRKAKRSGSSVFSMFS 21 ASSRGSRKAKRSGSSVFSMFS Sbjct: 282 ASSRGSRKAKRSGSSVFSMFS 344	myosin regulatory light chain 2 OS=Bombyx mori
Om13314_c0_g1_i8	0.025	Query: 16 MPRQLRLH 23 MPRQLRLH Sbjct: 1459 MPRQLRLH 1436	exostosin-like 1 OS=Mus musculus
Om1270_c0_g2_i1	2e-12	Query: 1 AVMAIDLSRFYGHSNSKR 18 AVMAIDLSRFYGHSNSKR Sbjct: 467 AVMAIDLSRFYGHSNSKR 520	IDLSRF-like peptide OS=Camponotus floridanus
Om18989_c0_g1_i1	0.077	Query: 4 LYWNLRSRGE 13 LY +LR+RG+ Sbjct: 340 LYRDLRTRGD 369	AP-5 complex subunit zeta-1 OS=Mus musculus
Om10339_c0_g1_i4	3e-13	Query: 1 DAYRDKKSAKELNQLEVAIG 20 DAYRDKKSAKELNQLEVAIG Sbjct: 2935 DAYRDKKSAKELNQLEVAIG 2876	voltage-gated sodium channel Para OS=Drosophila melanogaster
Om11239_c0_g2_i4	0.014	Query: 4 FSALLQVLM 12 FSALLQVLM Sbjct: 678 FSALLQVLM 704	midasin OS=Giardia intestinalis
Om12033_c3_g1_i3	2e-13	Query: 1 DKRDGMSREGSGRVAVYKM 19 DKRDGMSREGSGRVAVYKM Sbjct: 1956 DKRDGMSREGSGRVAVYKM 2012	cytosolic carboxypeptidase-like protein 5 OS=Xenopus tropicalis
Om17007_c0_g1_i1	0.05	Query: 5 FTYLVKSH 12 FTYLVKSH Sbjct: 317 FTYLVKSH 340	probable chitinase 2 OS=Drosophila melanogaster
Om3172_c0_g2_i1	0.056	Query: 7 FYNNLVCLIQNVL 19 FY N VCLIQN L Sbjct: 2867 FYINWVCLIQNGL 2905	bloom syndrome protein homolog OS=Drosophila melanogaster
Om19128_c0_g1_i1	0.054	Query: 5 ERLRNLGELPTWLYR 19 E LRNL + TWLYR Sbjct: 26 ESLRNLLQFRTWLYR 70	DNA ligase OS=Symbiobacterium thermophilum (strain T / IAM 14863)
Om18800_c0_g1_i1	3e-13	Query: 1 GILSMANAGPNTNGSQFFI 19 GILSMANAGPNTNGSQFFI Sbjct: 1236 GILSMANAGPNTNGSQFFI 1180	peptidyl-prolyl cis-trans isomerase OS=Blattella germanica
Om7429_c0_g1_i1	0.003	Query: 7 LPIAMTFP 14 LPIAMTFP Sbjct: 213 LPIAMTFP 236	argininosuccinate synthase OS=Anopheles gambiae
Om13284_c0_g1_i1	0.068	Query: 8 ELAAAMKR 15 ELAA M R Sbjct: 175 ELAASMNR 152	ATP binding cassette subfamily F member 2 OS=Homo sapiens
Om4088_c0_g1_i1	2e-13	Query: 1 GLMGNDMLFAGYRRLGTVE 19 GLMGNDMLFAGYRRLGTVE Sbjct: 956 GLMGNDMLFAGYRRLGTVE 900	venom dipeptidyl peptidase 4 OS=Apis mellifera
Om11742_c0_g1_i1	0.072	Query: 4 ERIIQIYDILELV 16 +RIIQIY+ L+ + Sbjct: 499 DRIIQIYNFLQII 537	elongation of very long chain fatty acids protein AAEL008004 OS=Aedes aegypti
Om3000_c0_g1_i1	2e-16	Query: 1 GQKHVIGPGTVLRHLLEKKEIP 22 GQKHVIGPGTVLRHLLEKKEIP Sbjct: 1264 GQKHVIGPGTVLRHLLEKKEIP 1199	ATPase WRNIP1 OS=Mus musculus
Om12825_c0_g9_i1	6e-12	Query: 1 GYDSRVRLLLPPDFDETN 18 GYDSRVRLLLPPDFDETN Sbjct: 2820 GYDSRVRLLLPPDFDETN 2767	venom dipeptidyl peptidase 4 OS=Apis mellifera
Om15837_c1_g1_i1	7e-10	Query: 1 ICKAFRNIPGVDLMN 15 ICKAFRNIPGVDLMN Sbjct: 1126 ICKAFRNIPGVDLMN 1082	60S ribosomal protein L4 OS=Drosophila melanogaster
Om3775_c0_g1_i1	6e-42	Query: 1 IIQQMTSATAKYHDMLNNVREFMKLHEVPKALSERVMDYVISTWA 45 IIQQMTSATAKYHDMLNNVREFMKLHEVPKALSERVMDYVISTWA Sbjct: 469 IIQQMTSATAKYHDMLNNVREFMKLHEVPKALSERVMDYVISTWA 603	voltage-gated potassium channel Eag OS=Drosophila melanogaster
Om6583_c0_g1_i1	0.047	Query: 8 GYIHKSYVMSTTC 20 GYIHK VM TTC Sbjct: 495 GYIHKVWVMQTTC 457	deoxycytidine triphosphate deaminase OS=Gluconobacter oxydans (strain 621H)
Om25013_c0_g1_i1	0.01	Query: 6 FFLATLIPLVE 16 FFLATLI LV+ Sbjct: 128 FFLATLIALVQ 160	NADH quinone oxidoreductase subunit G OS=Baizongia pistaciae (strain Bp)
Om23529_c0_g1_i1	9e-10	Query: 1 ILGSKSSARIAKLEKAK 17 ILGSKSSARIAKLEKAK Sbjct: 288 ILGSKSSARIAKLEKAK 238	60S ribosomal protein L7a OS=Takifugu rubripes
Om18798_c0_g1_i1	2e-05	Query: 1 IPGTKMIFAGIKKKTER 17 IPGTKM+FAG KK +R Sbjct: 446 IPGTKMVFAGLKKTQDR 496	cytochrome c OS=Manduca sexta
Om7604_c0_g1_i2	7e-18	Query: 1 ITIDIALWKFETAKYYVTIIDAP 23 ITIDIALWKFETAKYYVTIIDAP Sbjct: 662 ITIDIALWKFETAKYYVTIIDAP 730	elongation factor 1-alpha OS=Apis mellifera
Om1245_c0_g1_i1	2e-10	Query: 1 KGVHGSRVRKIRTSVH 16 KGVHGSRVRKIRTSVH Sbjct: 388 KGVHGSRVRKIRTSVH 435	60S ribosomal protein L23a OS=Rattus norvegicus 3a
Om12807_c0_g1_i1	0.01	Query: 19 RPYRGPMM 26 RPY GPMM Sbjct: 53 RPYLGPMM 30	N/A
Om1099_c0_g1_i1	1e-05	Query: 1 KKTGYTFANCK 11 KKTGYTFANCK Sbjct: 216 KKTGYTFANCK 248	elongation factor Ts, mitochondrial OS=Aedes aegypti
Om9632_c0_g1_i1	0.022	Query: 1 KRLYDDLLS 9 KRLYDDLLS Sbjct: 362 KRLYDDLLS 388	acetylcholine receptor subunit alpha L1 OS=Schistocerca gregaria
Om10424_c0_g1_i1	2e-08	Query: 1 KSIYGQFNSNTNYI 14 KSIYGQFNSNTNYI Sbjct: 1193 KSIYGQFNSNTNYI 1234	vitellogenin1 OS=Fundulus heteroclitus
Om10292_c1_g1_i1	0.043	Query: 13 FIISTSVTMYN 23 FIIS S T YN Sbjct: 370 FIISISLTFYN 402	N/A
Om18737_c0_g1_i1	0.047	Query: 15 SIAFAVRL 22 SI FAVRL Sbjct: 192 SITFAVRL 169	regulator of nonsense transcripts 1 OS=Dictyostelium discoideum
Om12268_c0_g1_i9	5e-08	Query: 1 KTPPKPIYLEGALP 14 KTPPKPIYLEGALP Sbjct: 1422 KTPPKPIYLEGALP 1463	resistance to inhibitors of cholinesterase 3 OS=Caenorhabditis briggsae
Om27249_c0_g1_i1	0.0007	Query: 1 KYIYNSTATG 10 KYIYNSTATG Sbjct: 278 KYIYNSTATG 249	venom allergen 4 OS=Solenopsis geminata
Om9044_c1_g1_i1	0.052	Query: 9 MDFEHTFVTVEIY 21 MDFE TFV IY Sbjct: 703 MDFEYTFVNLSIY 741	spermidine/spermine N(1) acetyl transferase-like protein 1 OS=Mus musculus
Om13038_c1_g2_i23	0.023	Query: 1 LGATGISMG 9 LGATGISMG Sbjct: 1447 LGATGISMG 1473	phospholipase ABHD 3 OS=Homo sapiens
Om10758_c0_g2_i1	0.039	Query: 9 EQLRSLSSQL 18 EQLR+LSSQL Sbjct: 754 EQLRTLSSQL 783	protein-associating with the carboxyl terminal domain of ezrin OS=Homo sapiens
Om10157_c1_g1_i3	2e-15	Query: 1 LGYSVGTPEEGITANAIVVNSF 22 LGYSVGTPEEGITANAIVVNSF Sbjct: 525 LGYSVGTPEEGITANAIVVNSF 590	carboxypeptidase Q OS=Pongo abelii
Om26243_c0_g1_i1	0.09	Query: 1 LHLYPHILELS 11 LHLYPHI LS Sbjct: 481 LHLYPHIHTLS 449	N/A
Om1447_c0_g1_i1	3e-29	Query: 1 LGYSVGTPEEGITANAIVVNSF 22 LGYSVGTPEEGITANAIVVNSF Sbjct: 525 LGYSVGTPEEGITANAIVVNSF 590	peptidyl-alpha-hydroxyglycine alpha amidatinglyase 2 OS=Drosophila melanogaster
Om11401_c0_g1_i1	5e-16	Query: 1 LKVFRSQLNKHNIFYSPKPPI 21 LKVFRSQLNKHNIFYSPKPPI Sbjct: 408 LKVFRSQLNKHNIFYSPKPPI 470	programmed cell death protein 2 OS=Mus musculus
Om11969_c0_g1_i4	0.04	Query: 20 WLIAGEQTKILPFP 33 WLI Q KILPFP Sbjct: 2292 WLILMNQVKILPFP 2251	gamma-tubulin complex component 6 OS=Homo sapiens
Om13132_c1_g1_i2	2e-12	Query: 1 LPILRFFGNMFGYKNMI 17 LPILRFFGNMFGYKNMI Sbjct: 876 LPILRFFGNMFGYKNMI 926	probable cytochrome P450 304a1 OS=Drosophila melanogaster
Om6062_c0_g1_i1	0.0006	Query: 1 LTEKEDVVAKA 11 LTEKEDVVAKA Sbjct: 586 LTEKEDVVAKA 554	60S ribosomal protein L17 OS=Phlebotomus papatasi
Om6575_c0_g2_i1	3e-15	Query: 1 LTPTPWLDNKHSVFGRVHKG 20 LTPTPWLDNKHSVFGRVHKG Sbjct: 1865 LTPTPWLDNKHSVFGRVHKG 1924	peptidyl-prolyl isomerase domain and WD repeat-containing protein 1 OS=Bos taurus
Om1586_c0_g1_i1	3e-25	Query: 1 LVRGRTLTAATGKEVDAWFGIPYAQKPVGSL 31 LVRGRTLTAATGKEVDAWFGIPYAQKPVGSL Sbjct: 2565 LVRGRTLTAATGKEVDAWFGIPYAQKPVGSL 2657	acetylcholine esterase OS=Culex pipiens
Om13101_c8_g3_i1	7e-17	Query: 1 MVESIANFLELTKDEVRPCFNM 22 MVESIANFLELTKDEVRPCFNM Sbjct: 147 MVESIANFLELTKDEVRPCFNM 212	Pheromone binding protein Gp9 OS=Solenopsis sp (strain B0178)
Om8161_c0_g1_i1	2e-18	1 NDIEKILSSVGIETDSEKLKKVISEL 26 NDIEKILSSVGIETDSEKLKKVISEL Sbjct: 455 NDIEKILSSVGIETDSEKLKKVISEL 378	60S acidic ribosomal protein P2 OS=Drosophila melanogaster
Om12471_c0_g1_i9	6e-23	Query: 1 NMRAAAIVFQKYIRRWHAKQIAKKRQN 27 NMRAAAIVFQKYIRRWHAKQIAKKRQN Sbjct: 2472 NMRAAAIVFQKYIRRWHAKQIAKKRQN 2552	myosin IB OS=Drosophila melanogaster
Om12554_c0_g1_i4	0.034	Query: 4 IITVTTHIFIITT 16 IIT+TT + IITT Sbjct: 78 IITITTKVIIITT 40	N/A
Om12075_c0_g1_i1	7e-30	Query: 1 PPNTIVTYTVELKAIESDTDIEMLSIKQRKELGNKK 36 PPNTIVTYTVELKAIESDTDIEMLSIKQRKELGNKK Sbjct: 921 PPNTIVTYTVELKAIESDTDIEMLSIKQRKELGNKK 814	peptidyl-prolyl cis-trans isomerase FKBP8 OS=Homo sapiens
Om8207_c0_g1_i1	3e-17	Query: 1 PTVISDSDFEKELKNVQDRVRALL 24 PTVISDSDFEKELKNVQDRVRALL Sbjct: 1915 PTVISDSDFEKELKNVQDRVRALL 1844	laminin subunit gamma 1 OS=Drosophila melanogaster
Om11405_c0_g1_i1	0.092	Query: 7 TLRTLSSSE 15 TLRTLSSSE Sbjct: 85 TLRTLSSSE 59	transmembrane protein 132B OS=Homo sapiens
Om13064_c1_g6_i1	5e-13	Query: 1 QVIGASVDSHFCHLAWVNTPKKQ 23 QVI AS DSHF HLAW+NTP+KQ Sbjct: 3365 QVIAASTDSHFSHLAWINTPRKQ 3297	peroxiredoxin 1 OS=Drosophila melanogaster
Om7841_c0_g1_i1	0.002	Query: 7 VNGLALQLRNTSR 19 VN LA QLRNTSR Sbjct: 965 VNALAIQLRNTSR 927	E3 ubiquitin-protein ligase MYCBP2 OS=Homo sapiens
Om11014_c0_g1_i3	0.013	Query: 4 VHVFLNFWLKY 14 V+VFL+FWL Y Sbjct: 1742 VQVFLDFWLEY 1710	sphingomyelin phosphodiesterase 4 OS=Danio rerio
Om10326_c1_g1_i1	6e-37	Query: 1 TIEKQIGGDKNGEKRIVLLKKRRANYPTADPVTVHHAKKCF 41 TIEKQIGGDKNGEKRIVLLKKRRANYPTADPVTVHHAKKCF Sbjct: 656 TIEKQIGGDKNGEKRIVLLKKRRANYPTADPVTVHHAKKCF 534	60S ribosomal protein L6 OS=Sus scrofa
Om11842_c0_g1_i1	3e-26	Query: 1 TITEVTSNDEGKKWLSDNWKLCEPLKTTEHV 31 TITEVTSNDEGKKWLSDNWKLCEPLKTTEHV Sbjct: 2483 TITEVTSNDEGKKWLSDNWKLCEPLKTTEHV 2391	lysosomal ProX carboxypeptidase OS=Bos taurus
Om10227_c1_g1_i1	0.02	Query: 6 LILCIFQQDFGNLHMNRAY 24 LILCI QQDF L M Y Sbjct: 3328 LILCICQQDFVVLYMESTY 3384	nuclear pore complex protein Nup205 OS=Homo sapiens
Om9379_c0_g1_i2	0.073	Query: 9 LVVTIAAVGSVSAA 22 LVVTIAAV + AA Sbjct: 1928 LVVTIAAVATAAAA 1887	FAM46C OS=Danio rerio
Om13354_c10_g1_i2	0.09	Query: 4 VIYATLHL 11 VIYATLHL Sbjct: 36 VIYATLHL 13	sodium-independent sulfate anion transporter OS=Homo sapiens
Om1373_c0_g1_i1	1e-05	Query: 1 VHVLLAATCLVA 12 VHVLLAATCLVA Sbjct: 380 VHVLLAATCLVA 415	icarapin-like OS=Apis mellifera
a alignment of de novo amino acid sequence and the amino acid sequence predicted by O. monticola transcriptome data
b proteins matched from the UniProtKB data using the transcriptome data
N/A= not applicable
